# Supplementary material for: Comparison in antioxidant and antitumor activities of pine polyphenols and its seven biotransformation extracts by fungi
Source: PeerJ. 2017 May 23;5:e3264. doi: 10.7717/peerj.3264 (PMC5444373; doi:10.7717/peerj.3264)
Supplement: Supplemental Information 1 [file peerj-05-3264-s001.xls]

## Sheet: Figure.1.
N	1	2	3
PPs	58.2781	55.6909	59.0653
A. niger	64.1899	59.7096	60.0998
A. oryzae	61.1418	58.2233	58.1826
T. viride	39.6389	32.0315	35.8352
Rhizopus.sp	55.5794	57.8282	50.3306
A. carbonarius	64.0429	61.4064	65.1793
M. wutungkiao	60.7989	59.8836	55.9683
A. candidus	50.3855	48.0159	45.6462

## Sheet: Figure.2
N	1	2	3
A. niger	53.39	50.99	55.85
A. oryzae	62.79	64.38	69.74
T. viride	42.38	45.03	45.11
Rhizopus.sp	31.45	30.41	30.45
A. carbonarius	46.99	44.82	53.8
M. wutungkiao	69.4	66.28	69.14
A. candidus	34.89	35.9	38.47

## Sheet: Figure.3.
N	1	2	3
PPs	671.316	666.814	705.818
A. niger	766.248	712.62	789.876
A. oryzae	700.382	758.318	756.254
T. viride	442.684	464.987	487.289
Rhizopus.sp	658.325	680.529	702.733
A. carbonarius	776.619	812.261	817.903
M. wutungkiao	690.564	740.892	761.221
A. candidus	477.038	519.145	561.252

## Sheet: Figure.4.
	PPs			A. niger			A. oryzae			T. viride			Rhizopus			A. carbonarius			M. wutungkiao			A. candidus
N	1	2	3	1	2	3	1	2	3	1	2	3	1	2	3	1	2	3	1	2	3	1	2	3
0.1	15.62	15.16	16.49	18.6837	18.2538	19.4135	15.0524	14.1154	12.8783	9.1048	9.4128	8.4968	22.7783	22.0501	23.5064	21.6539	21.8662	21.7784	32.5502	33.0783	33.9064	11.0832	10.4569	10.92
0.2	28.77	27.29	29.72	29.2046	27.8401	30.2691	36.6459	35.7672	34.5886	28.2805	28.899	27.6619	40.9794	40.1948	41.7641	44.4779	45.2243	45.6707	46.9676	45.9618	47.6735	22.7579	20.933	21.9955
0.3	45.72	44.79	47.37	55.2256	54.6264	56.4248	48.2393	47.4191	46.2989	37.6562	39.1853	36.4271	54.0218	52.1806	50.3394	59.7631	57.3018	58.3825	53.457	52.4736	54.7405	34.6327	31.4091	32.8709
0.4	58.67	56.43	61.39	68.7944	68.2757	69.0131	56.18	56.6422	57.1043	46.5255	47.5691	45.1819	67.2691	66.0255	64.7819	70.2009	73.309	71.905	63.117	64.7936	66.7702	54.3514	52.6433	53.6473
0.5	68.54	65.22	71.81	77.4825	74.1001	80.5649	66.3673	67.1611	68.2549	59.1032	55.8053	57.3042	80.2757	78.7737	77.2716	76.5252	81.086	78.9556	73.5258	74.8079	75.59	63.481	62.3126	64.3494
0.6	71.17	67.82	74.21	79.4825	75.6001	83.0649	67.9229	70.0329	72.1428	62.179	57.3165	59.9977	82.2802	80.1857	78.0912	80.8002	84.4198	82.61	76.8963	75.1795	78.0131	67.9176	69.4791	65.7561

## Sheet: Figure.5.
	PPs			A. niger			A. oryzae			T. viride			Rhizopus			A. carbonarius			M. wutungkiao			A. candidus
N	1	2	3	1	2	3	1	2	3	1	2	3	1	2	3	1	2	3	1	2	3	1	2	3
0.05	13.36	11.23	14.07	21.0076	20.6022	24.4131	5.42781	6.73934	8.05087	2.64898	2.87876	3.40854	11.3796	11.7166	10.0481	20.1002	20.8608	21.6214	12.512	12.931	14.2215	11.9043	11.4348	10.1695
0.1	22.72	20.81	21.77	42.4153	41.2044	42.4262	12.8556	13.4787	14.1017	7.09797	8.95752	7.81707	20.7592	19.4332	20.0962	34.2005	36.7217	36.2428	29.424	27.862	28.043	25.8086	27.8695	25.3391
0.15	50.37	47.91	48.99	61.8732	56.9199	63.8264	37.317	40.6007	43.8845	13.8965	14.6361	18.3758	60.8029	59.1469	61.4749	72.1744	76.5172	77.8599	79.2491	66.8112	72.0302	47.1438	52.871	47.5074
0.2	66.16	61.38	65.27	63.6994	61.603	62.7957	59.5852	64.8384	70.0916	28.2215	31.8279	32.4344	88.6502	81.3933	83.5218	86.0313	91.2618	93.4922	89.0748	75.7814	80.9281	81.1908	83.4311	85.3109
0.25	84.77	79.97	86.66	75.0041	71.4248	78.5835	58.3829	61.6662	61.9494	30.3021	33.8731	38.444	98.0451	95.9956	96.0203	92.7984	89.4008	92.5996	86.6385	79.3543	81.4964	96.3167	96.2973	99.336
0.3	88.39	85.55	94.23	78.9458	74.4578	83.4338	47.5169	50.8635	57.2102	48.0647	41.5918	48.5375	95.4405	94.4109	99.47	97.5275	88.1652	91.3463	83.5289	77.387	86.6707	94.2551	93.2209	98.2892

## Sheet: Figure.6.
	PPs			A. niger			A. oryzae			T. viride			Rhizopus			A. carbonarius			M. wutungkiao			A. candidus
N	1	2	3	1	2	3	1	2	3	1	2	3	1	2	3	1	2	3	1	2	3	1	2	3
0.2	23.71	17.62	26.78	34.0822	31.0119	34.1525	18.7443	15.5786	21.91	26.778	21.1481	29.408	16.3367	14.0817	16.2092	31.0617	26.4765	32.647	21.0553	16.3716	22.739	25.9259	25.3748	19.2104
0.4	43.11	36.69	38.39	60.0239	60.3051	60.1645	32.4886	29.1573	32.82	46.816	42.2961	47.5561	31.6733	33.1635	32.4184	47.9529	51.1234	51.294	38.478	32.7433	37.1106	51.5852	55.7496	50.4207
0.6	51.09	46.11	56.09	69.5358	75.9576	71.2467	48.233	39.7359	50.73	65.2241	54.4442	61.3341	52.51	47.7452	51.6276	62.9704	67.1852	68.3999	50.217	43.1149	45.166	64.1311	72.6244	69.8778
0.8	60.81	55.79	59.78	79.0478	80.6101	81.329	55.9773	50.3145	64.6401	74.6321	68.5922	70.1121	68.3467	59.327	66.8368	76.9879	77.1469	79.5059	54.956	48.4866	51.2213	79.8415	81.4992	82.1704
1	74.8	66.55	73.68	78.043	85.6126	81.8278	67.2767	62.2105	69.3428	80.7166	71.8958	77.8062	63.8972	60.859	67.9353	79.1472	81.4123	86.6773	69.8705	59.8038	61.8371	81.3366	85.0867	88.8369
1.2	76.27	67.85	73.56	81.9267	79.0382	83.6151	74.576	68.1066	78.0455	83.8012	76.1993	81.5002	61.9575	59.3911	67.5239	80.3064	85.4776	89.8488	77.7849	69.121	73.653	84.8317	85.0031	91.1745

## Sheet: Figure.7.
	PPs			A. niger			A. oryzae			T. viride			Rhizopus			A. carbonarius			M. wutungkiao			A. candidus
N	1	2	3	1	2	3	1	2	3	1	2	3	1	2	3	1	2	3	1	2	3	1	2	3
0.1	0.2171	0.2117	0.2158	0.32253	0.29973	0.31263	0.29183	0.29987	0.30191	0.23813	0.24393	0.26233	0.08145	0.07541	0.0793	0.26427	0.23057	0.26797	0.30982	0.30533	0.33084	0.1248	0.14307	0.16653
0.2	0.3769	0.3631	0.3728	0.54893	0.51553	0.53073	0.48873	0.52423	0.55673	0.4194	0.4202	0.3986	0.1229	0.0829	0.1179	0.4145	0.4513	0.4581	0.48663	0.51893	0.58123	0.2547	0.2507	0.2477
0.3	0.3949	0.39	0.3949	0.67995	0.67895	0.67795	0.68267	0.69197	0.70427	0.58863	0.56603	0.51343	0.2118	0.2328	0.2368	0.56307	0.61487	0.63667	0.64923	0.65493	0.67063	0.31829	0.33637	0.31233
0.4	0.5573	0.5441	0.5551	0.8792	0.7394	0.8078	0.84514	0.82352	0.83133	0.6811	0.6604	0.6197	0.31731	0.28967	0.29203	0.75053	0.72913	0.66773	0.7811	0.7291	0.7701	0.46773	0.49607	0.4769
0.5	0.6502	0.6647	0.6741	0.86207	0.89547	0.93187	0.94113	0.85953	0.90183	0.8047	0.7199	0.7773	0.4585	0.4743	0.4601	0.8324	0.8194	0.8409	0.8576	0.7426	0.8101	0.68297	0.72089	0.70193
0.6	0.7553	0.7731	0.7816	1.01143	1.05428	1.09113	1.09309	1.00645	1.04977	0.93586	0.85686	0.88136	0.51923	0.51377	0.47831	0.95638	0.93968	0.97803	1.02801	0.87751	0.96776	0.79433	0.7645	0.76416
